# Supplementary material
Source: HighWire-hosted journal article supplement (https://srh.bmj.com/content/43/3/201)
Supplement: inline-supplementary-material-1 [file inline-supplementary-material-1.pdf]

Manuscript: “Incarceration and exposure to internally displaced persons camps associated with reproductive rights abuses among sex workers in northern Uganda”

**Supplementary Material**

| <b>Table A: Bivariate analyses of unsafe abortion (n=40) among female sex workers who reported abortions (n=62) in Gulu, northern Uganda</b> |                      |                     |                                |                  |
|----------------------------------------------------------------------------------------------------------------------------------------------|----------------------|---------------------|--------------------------------|------------------|
| <i>Characteristics</i>                                                                                                                       | <i>Yes<br/>n (%)</i> | <i>No<br/>n (%)</i> | <i>Odds Ratio<br/>(95% CI)</i> | <i>p - value</i> |
| <b>Age (years) (Med, IQR)</b>                                                                                                                | 21(19-25.5)          | 21(19-25)           | 1.00 (0.88-1.15)               | 0.912            |
| <b>None or incomplete primary education</b>                                                                                                  |                      |                     |                                |                  |
| yes                                                                                                                                          | 18 (45.0)            | 10 (45.5)           | 0.98 (0.35 – 2.79)             | 0.973            |
| <b>Financially supports others</b>                                                                                                           |                      |                     |                                |                  |
| yes                                                                                                                                          | 38 (95.0)            | 18 (81.8)           | 4.22 (0.71 – 25.23)            | 0.093            |
| <b>Difficulty accessing condoms*</b>                                                                                                         |                      |                     |                                |                  |
| yes                                                                                                                                          | 23 (57.5)            | 10 (45.5)           | 1.62 (0.57 – 4.63)             | 0.363            |
| <b>Ever been tested for STIs†</b>                                                                                                            |                      |                     |                                |                  |
| yes                                                                                                                                          | 11 (27.5)            | 11 (50.0)           | 0.38 (0.13 – 1.12)             | 0.077            |
| <b>Ever lived in an IDP camp†</b>                                                                                                            |                      |                     |                                |                  |
| yes                                                                                                                                          | 33 (82.5)            | 10 (45.5)           | 5.66 (1.76 – 18.23)            | <b>0.003</b>     |
| <b>Ever been incarcerated†</b>                                                                                                               |                      |                     |                                |                  |
| yes                                                                                                                                          | 12 (30.00)           | 5 (22.7)            | 1.46 (0.44 – 4.86)             | 0.539            |
| <b>Fear of violence from client if asked to use a condom*</b>                                                                                |                      |                     |                                |                  |
| yes                                                                                                                                          | 35 (87.5)            | 13 (59.1)           | 3.77 (1.02 – 14.00)            | 0.040            |
| * Last 6 months                                                                                                                              |                      |                     |                                |                  |
| † Lifetime                                                                                                                                   |                      |                     |                                |                  |

Reproductive rights abuses among sex workers - Uganda

| <b>Table B: Bivariate analyses of coerced abortion (n=18) among female sex workers who reported abortions (n=62) in Gulu, northern Uganda</b> |                      |                     |                                |                  |
|-----------------------------------------------------------------------------------------------------------------------------------------------|----------------------|---------------------|--------------------------------|------------------|
| <i>Characteristics</i>                                                                                                                        | <i>Yes<br/>n (%)</i> | <i>No<br/>n (%)</i> | <i>Odds Ratio<br/>(95% CI)</i> | <i>p - value</i> |
| <b>Age (years) (Med, IQR)</b>                                                                                                                 | 20 (18-22)           | 22(19-26.5)         | 0.84 (0.71-1.00)               | 0.046            |
| <b>None or incomplete primary education</b>                                                                                                   |                      |                     |                                |                  |
| yes                                                                                                                                           | 6 (33.3)             | 22 (50.0)           | 0.50 (0.16 – 1.57)             | 0.231            |
| <b>Have children</b>                                                                                                                          |                      |                     |                                |                  |
| yes                                                                                                                                           | 13 (72.2)            | 41 (93.2)           | 0.19 (0.04 – 0.91)             | 0.025            |
| <b>Difficulty accessing condoms*</b>                                                                                                          |                      |                     |                                |                  |
| yes                                                                                                                                           | 10 (55.6)            | 23 (52.3)           | 1.14 (0.38 – 3.44)             | 0.814            |
| <b>Ever been incarcerated†</b>                                                                                                                |                      |                     |                                |                  |
| yes                                                                                                                                           | 9 (50.0)             | 8 (18.2)            | 4.50 (1.36 – 14.94)            | <b>0.011</b>     |
| <b>Fear of violence from client if asked to use a condom*</b>                                                                                 |                      |                     |                                |                  |
| yes                                                                                                                                           | 17 (94.4)            | 31 (70.5)           | 6.03 (0.72 – 50.80)            | 0.067            |
| * Last 6 months                                                                                                                               |                      |                     |                                |                  |
| † Lifetime                                                                                                                                    |                      |                     |                                |                  |
